# Supplementary material for: A Novel Family of Lysosomotropic Tetracyclic Compounds for Treating Leukemia
Source: MDPI journal article supplement (doi:10.3390/cancers15061912), 2023-03-22

# Supplementary Figure S8

A

| ADMET                                                  |                                                           | EDK-87          | EDK-88          |
|--------------------------------------------------------|-----------------------------------------------------------|-----------------|-----------------|
| <b>Solubility</b> ( $\mu\text{M}$ )                    | Gastric fluid                                             | $177.9 \pm 5.0$ | $197.7 \pm 5.9$ |
|                                                        | Intestinal fluid                                          | $106.7 \pm 0.3$ | $122.3 \pm 2.8$ |
|                                                        | PBS pH 7.4                                                | $4.6 \pm 0.5$   | $53.5 \pm 0.3$  |
| <b>Partition coefficient</b>                           | logD                                                      | 4.77            | 4.49            |
| <b>Plasma protein binding</b>                          | % Bound                                                   | $99.45 \pm 0.2$ | $99.1 \pm 0.3$  |
| <b>Permeability</b> (Caco-2)                           | Papp <sub>AB</sub> ( $10^{-6}\text{cm s}^{-1}$ )          | $0.21 \pm 0.01$ | $0.33 \pm 0.04$ |
|                                                        | Papp <sub>BA</sub> ( $10^{-6}\text{cm s}^{-1}$ )          | $0.19 \pm 0.05$ | $0.29 \pm 0.06$ |
|                                                        | Efflux ratio                                              | 0.90            | 0.88            |
| <b>Intrinsic clearance</b><br>(human liver microsomes) | CL <sub>int</sub> ( $\text{ml min}^{-1} \text{kg}^{-1}$ ) | <115.5          | 144.5           |
|                                                        | T <sub>1/2</sub> (min)                                    | >60             | $64.9 \pm 14$   |

B

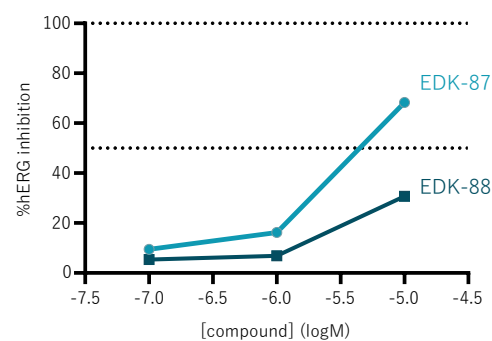

C

|      | Lipinski | EDK-87 | EDK-88 |   |
|------|----------|--------|--------|---|
| logP | <5       | 4.77   | 4.49   | ✓ |
| MW   | <500     | 317    | 305    | ✓ |
| HBD  | <5       | 0      | 0      | ✓ |
| HBA  | <10      | 1      | 1      | ✓ |

D

| PK                                                    | EDK-87 30 mg/kg |        | EDK-88 30 mg/kg |       |
|-------------------------------------------------------|-----------------|--------|-----------------|-------|
|                                                       | PO              | SC     | PO              | SC    |
| T <sub>max</sub> (h)                                  | 0,5             | 4      | 0,5             | 4     |
| C <sub>max</sub> ( $\mu\text{M}$ )                    | 3,3             | 2,1    | 10,2            | 5,4   |
| AUC <sub>0-24h</sub> ( $\text{h} \cdot \mu\text{M}$ ) | 14,9            | 26,6   | 28,7            | 72,2  |
| AUC <sub>inf</sub> ( $\text{h} \cdot \mu\text{M}$ )   | 15,7            | 27,1   | 41,3            | 72,3  |
| t <sub>1/2</sub> (h)                                  | 6,2             | 4,2    | 2,2             | 2,6   |
| k <sub>e</sub> ( $\text{h}^{-1}$ )                    | 0,112           | 0,1667 | 0,308           | 0,269 |
| V <sub>D</sub> (L/kg)                                 | 53,87           | 20,96  | 7,64            | 5,06  |
| CI (L/h·kg)                                           | 6,02            | 3,49   | 2               | 1,36  |

E

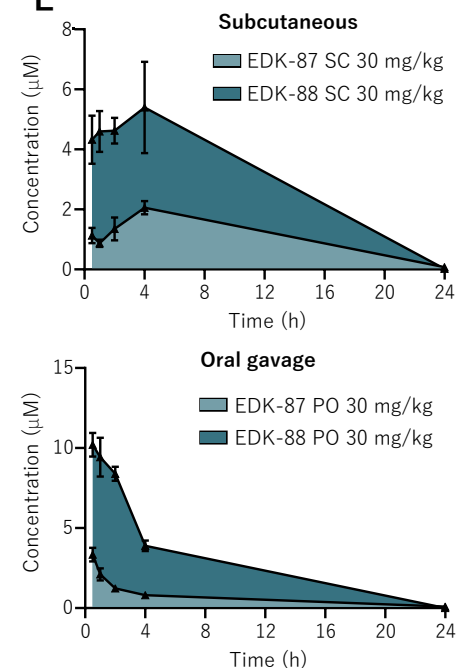

Supplement: s1 [file s1]
