# Supplementary material for: A Novel Family of Lysosomotropic Tetracyclic Compounds for Treating Leukemia
Source: MDPI journal article supplement (doi:10.3390/cancers15061912), 2023-03-22
Supplement: s1 [file s1]

Supplementary Table S1. AML primary samples information

| #    | Type | Gen | Age (yr) | WHO subtype                                     | WBC, x10 <sup>9</sup> cells/L | % Blasts PB | % Blasts BM | Karyotype                                                                                       | Additional molecular features                                                                                            | Risk |
|------|------|-----|----------|-------------------------------------------------|-------------------------------|-------------|-------------|-------------------------------------------------------------------------------------------------|--------------------------------------------------------------------------------------------------------------------------|------|
| #61  | LA   | M   | 48       | AML, NOS                                        | 131                           | 63          | 81          | 46,XY                                                                                           | N/D                                                                                                                      | Int  |
| #63  | LA   | F   | 44       | AML with mutated <i>NPM1</i>                    | 159                           | 76          | 80          | N/A                                                                                             | <i>NPM1</i> mut                                                                                                          | Fav  |
| #98  | LA   | F   | 63       | AML with mutated <i>NPM1</i>                    | 384                           | 100         | 94          | N/A                                                                                             | <i>FLT3</i> -ITD, <i>DNMT3A</i> mut, <i>IDH2</i> mut                                                                     | Int  |
| #130 | LA   | M   | 47       | AML with mutated <i>NPM1</i>                    | 118                           | 23          | 48          | 46,XY                                                                                           | <i>DNMT3A</i> mut, <i>IDH2</i> mut, <i>TP53</i> mut                                                                      | Adv  |
| #132 | PB   | M   | 61       | AML with myelodysplasia related changes         | 41.1                          | N/A         | 16          | 41,X-Y,add(1)(p34),add(2)(p25),-3,-3,-5,add(6)(p25),-7,-12,add(16)(q24),-17,-18,-21,+4mar[cp20] | <i>TP53</i> mut                                                                                                          | Adv  |
| #133 | LA   | M   | 40       | AML with mutated <i>NPM1</i>                    | 109                           | 96          | 93          | N/A                                                                                             | <i>IDH1</i> mut, <i>NPM1</i> mut, <i>FLT3</i> -ITD                                                                       | Int  |
| #134 | LA   | M   | 37       | AML with inv(16)(p13.1q22); <i>CBFB-MYH11</i>   | 295                           | 98          | 91          | 47,XY,+9,inv(16)(p13;q22),der(17)t(11;17)(q13;q25)                                              | <i>CEBPA</i> mut, <i>FLT3</i> -N676K, <i>WT1</i> mut                                                                     | Fav  |
| #135 | PB   | M   | 28       | AML with t(8;21)(q22;q22); <i>RUNX1-RUNX1T1</i> | 45                            | 83          | 79          | 47,XY,t(8;21)(q22;q22),+8[5]/46,XY[17]                                                          | <i>RB1</i> mut                                                                                                           | Fav  |
| #136 | PB   | F   | 43       | AML with biallelic mutations of <i>CEBPA</i>    | 7                             | 74          | 51          | 46,XY                                                                                           | <i>CEBPA</i> mut, <i>WT1</i> mut, <i>TET2</i> mut                                                                        | Fav  |
| #141 | LA   | M   | 65       | AML with mutated <i>NPM1</i>                    | 107                           | 62          | 80          | 46,XY                                                                                           | <i>NPM1</i> mut, <i>FLT3</i> -ITD                                                                                        | Fav  |
| #147 | BM   | F   | 74       | AML with biallelic mutations of <i>CEBPA</i>    | 3.2                           | 20          | 23          | 46,XX                                                                                           | <i>CEBPA</i> mut, <i>TET2</i> mut                                                                                        | Fav  |
| #148 | BM   | M   | 48       | AML, NOS without maturation                     | 40                            | 95          | 85          | 47,XY,+11[13]/46,XY[7]                                                                          | <i>IDH2</i> mut, <i>DNMT3A</i> mut, <i>NF1</i> mut                                                                       | Int  |
| #152 | PB   | M   | 84       | AML with myelodysplasia related changes         | 36                            | 84          | 66          | 46,XY,del(20)(q11q13)[5]/48,XY,+8,del(20)(q11q13),+21[15]                                       | <i>JAK2</i> mut, <i>IDH2</i> mut, <i>SRSF2</i> mut, <i>ETV6-MN1</i>                                                      | Int  |
| #153 | BM   | M   | 72       | AML with mutated <i>NPM1</i>                    | 3.5                           | 16          | 38          | 46,XY                                                                                           | <i>NPM1</i> mut, <i>FLT3</i> -ITD, <i>IDH2</i> mut, <i>RUNX1</i> mut, <i>WT1</i> mut, <i>IDH1</i> mut, <i>DNMT3A</i> mut | Fav  |

\*Adv indicates adverse; BM, bone marrow; F, female; Fav, favorable; Gen, gender; int, intermediate; LA, leukapheresis; M, male; WBC, white blood cells count; WHO, World Health Organization; yr, years
