# Supplementary material for: A Novel Family of Lysosomotropic Tetracyclic Compounds for Treating Leukemia
Source: Cancers (Basel). 2023 Mar 22;15(6):1912. doi: 10.3390/cancers15061912 (PMC10047683; doi:10.3390/cancers15061912)
Supplement: Supplementary file 1 [file cancers-15-01912-s001.zip]

Archive with 11 entries (11 files):
- Carbo Supplementary Figures Legend v8.pdf
- Carbo Supplementary File S1.pdf
- Carbo Supplementry Table S1.pdf
- Figure S1. pAML Cytotoxicity.pdf
- Figure S2. In vivo_compressed.pdf
- Figure S3. v5.Lysosome.pdf
- Figure S4.LMP.pdf
- Figure S5.Calcium MYC giemsa screenshot.pdf
- Figure S6.v2 Mitochondria.pdf
- Figure S7.v2. Synergism.pdf
- Figure S8. PK+ADMET.pdf
