# Supplementary figures and images for: A Novel Family of Lysosomotropic Tetracyclic Compounds for Treating Leukemia
Source: MDPI journal article supplement (doi:10.3390/cancers15061912), 2023-03-22

**Supplementary Figure S7**

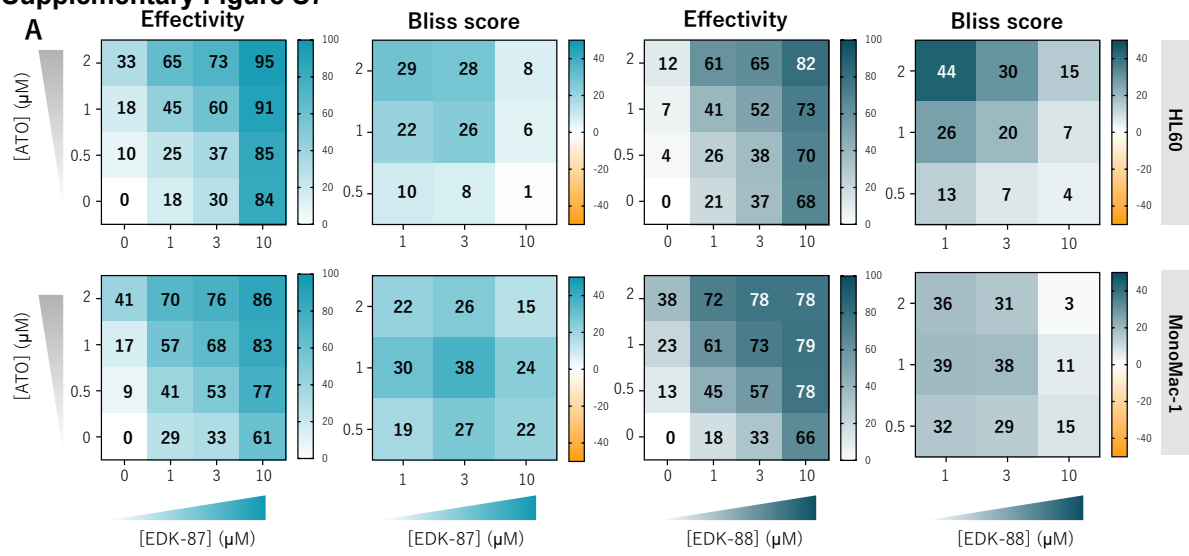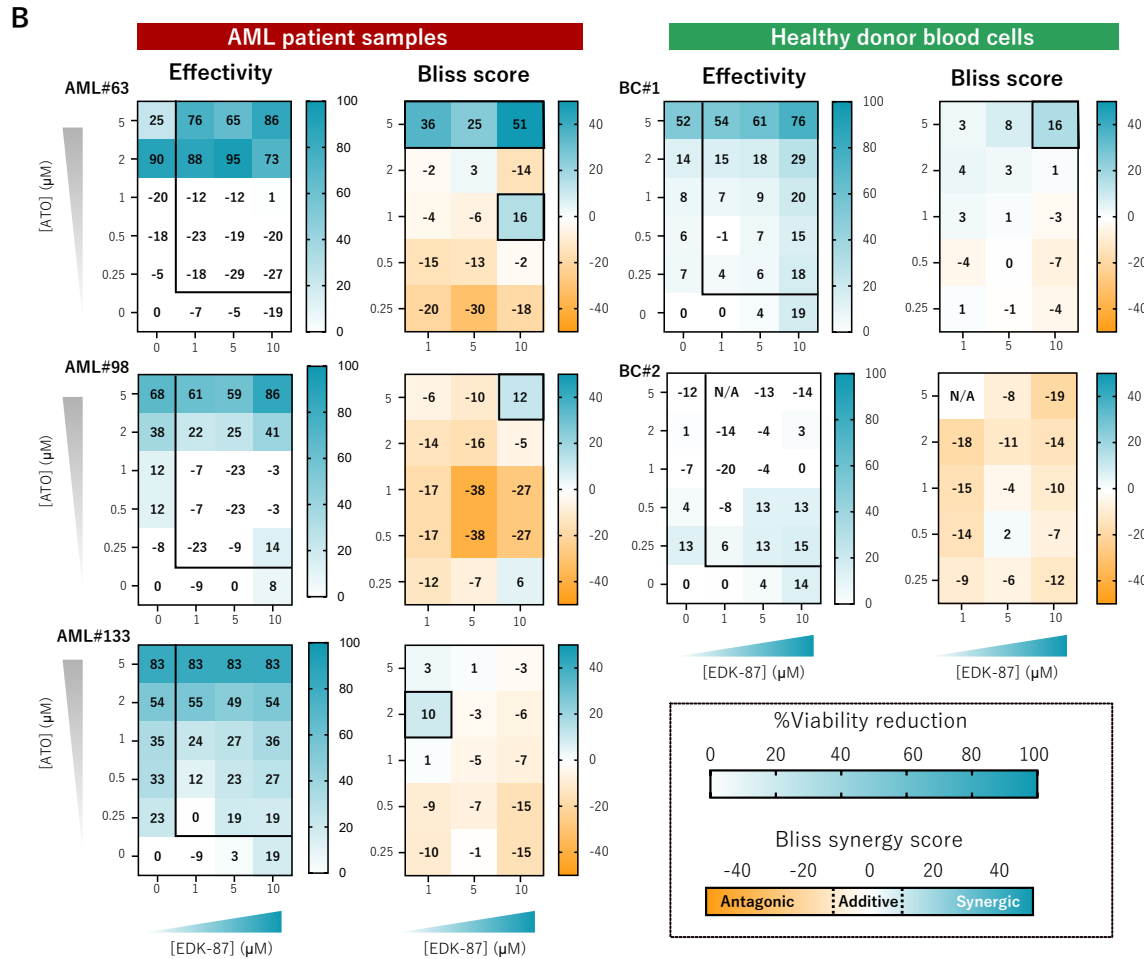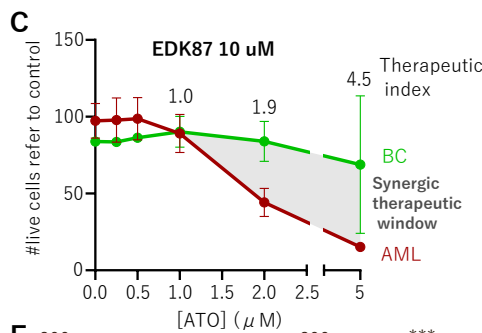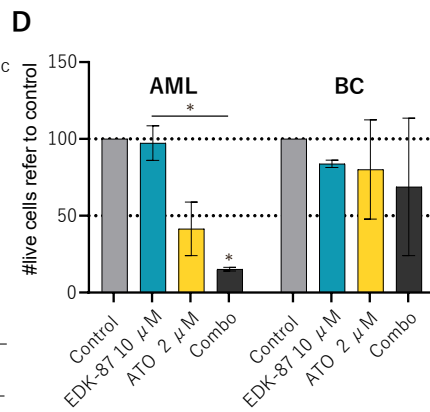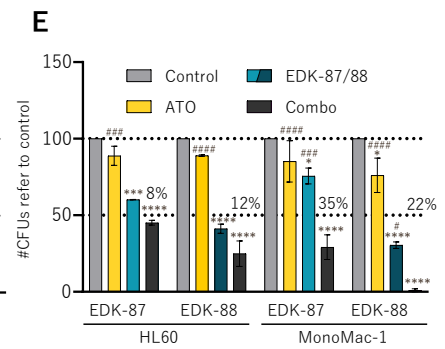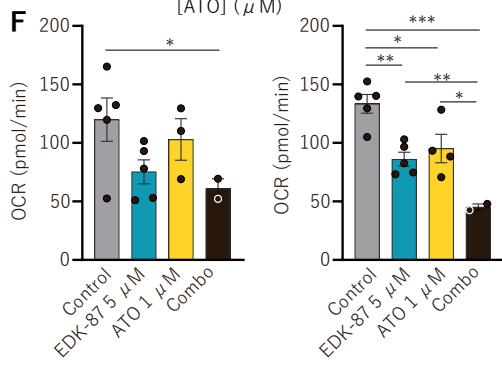

Supplement: s1 [file s1]

Supplementary Figure S1

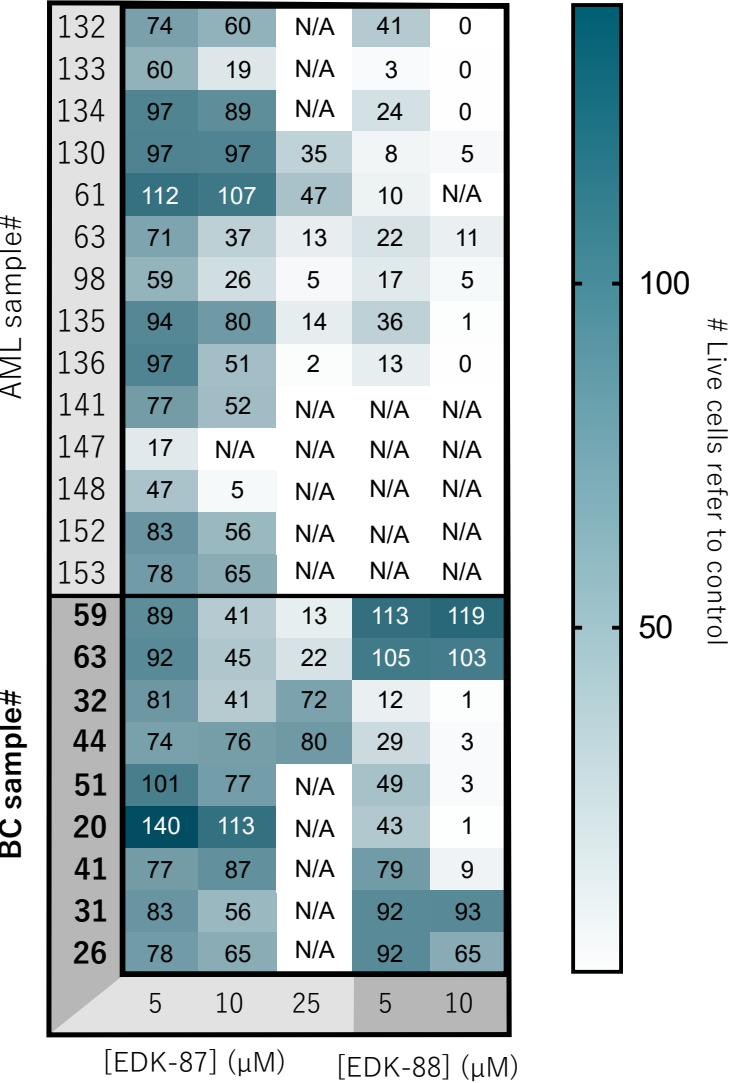

Supplement: s1 [file s1]

Supplementary Figure S5

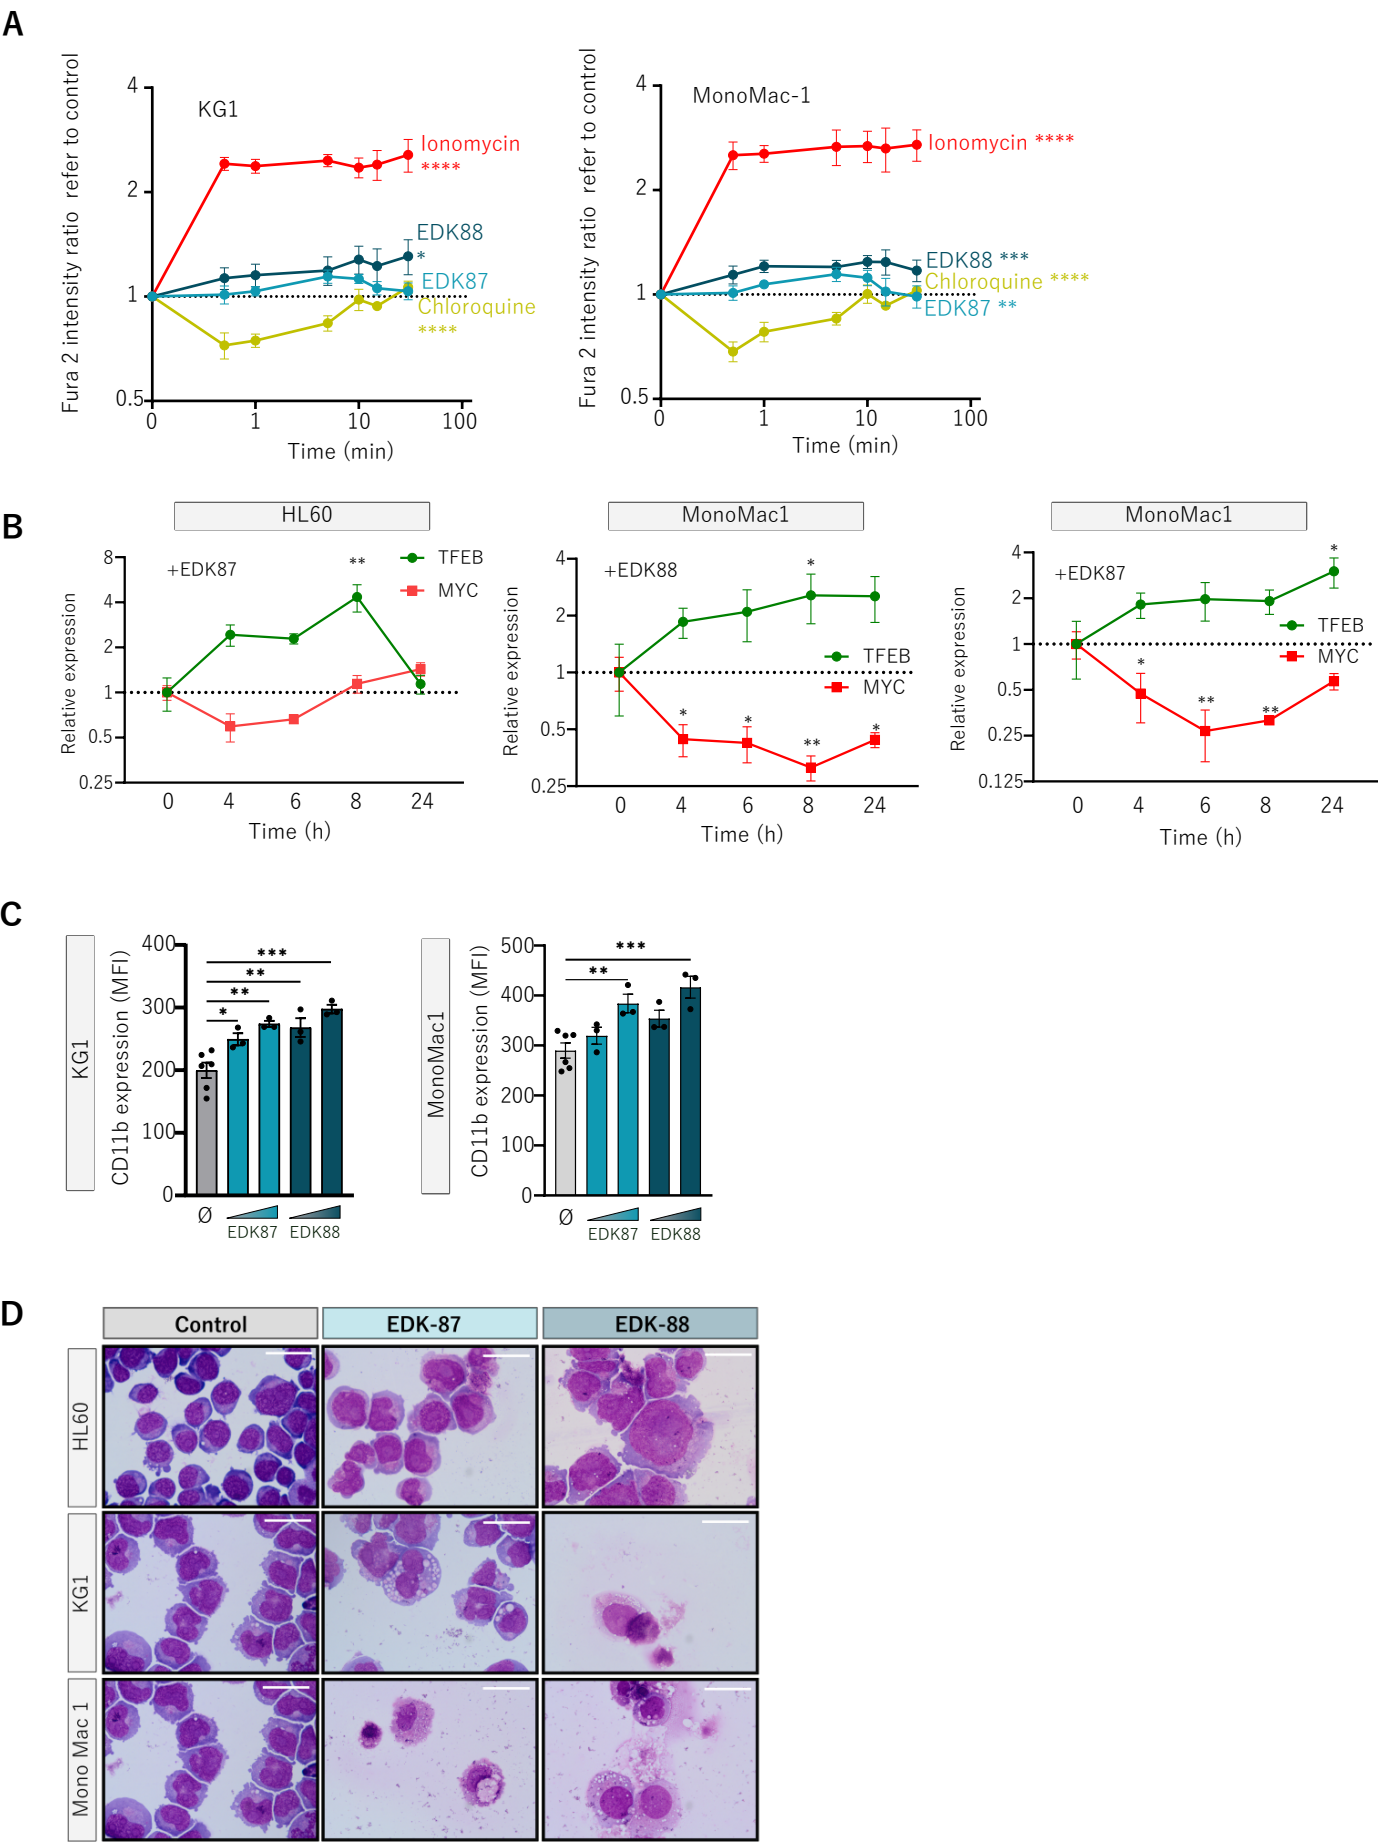

Supplement: s1 [file s1]

Supplementary Figure S4

A

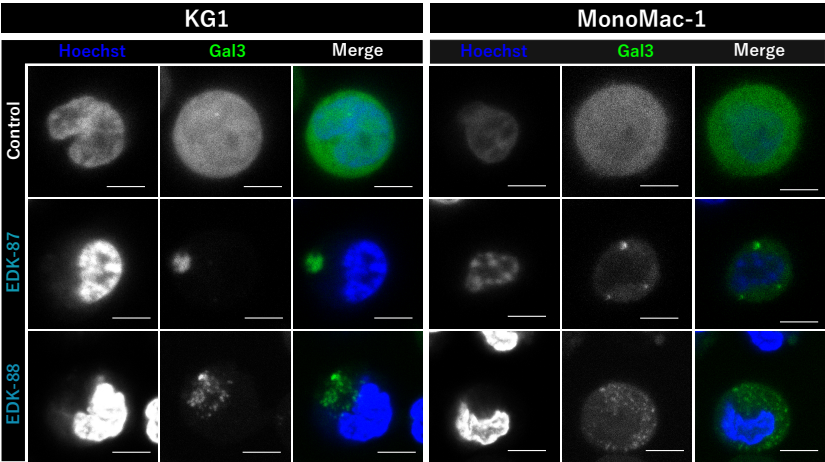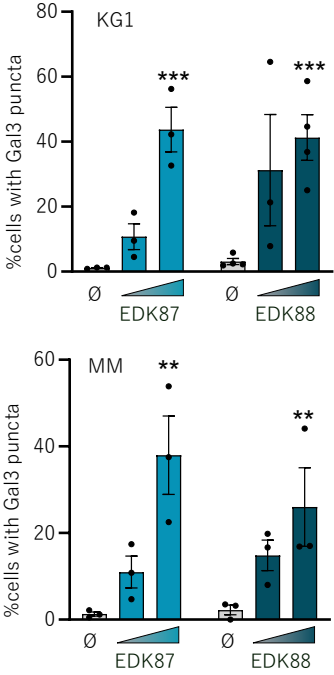

B

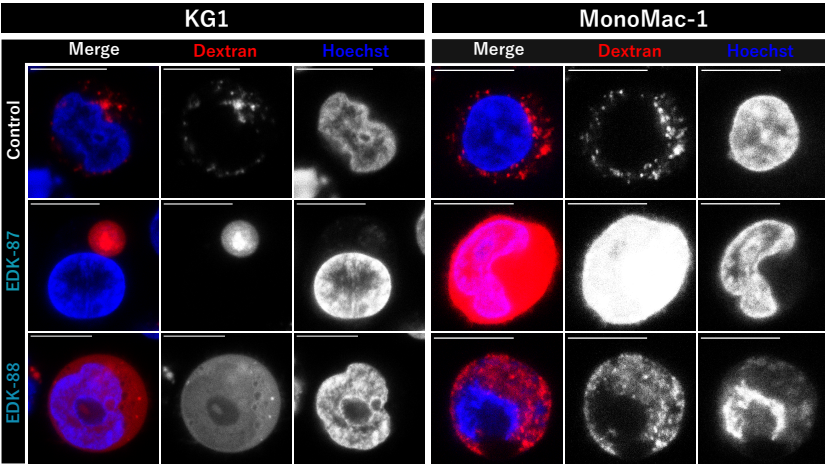

C

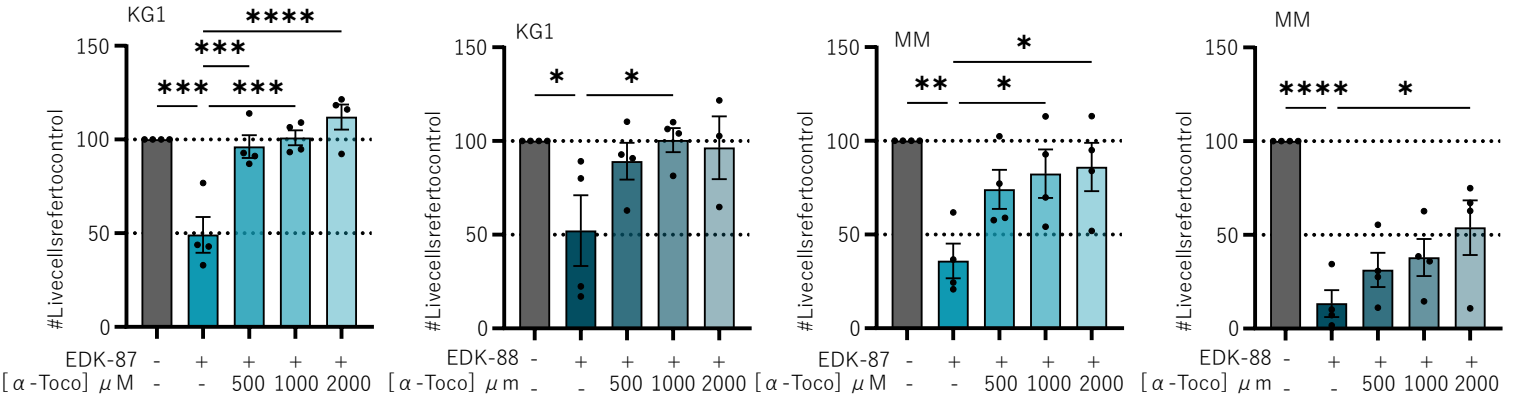

Supplement: s1 [file s1]

Supplementary Figure S2

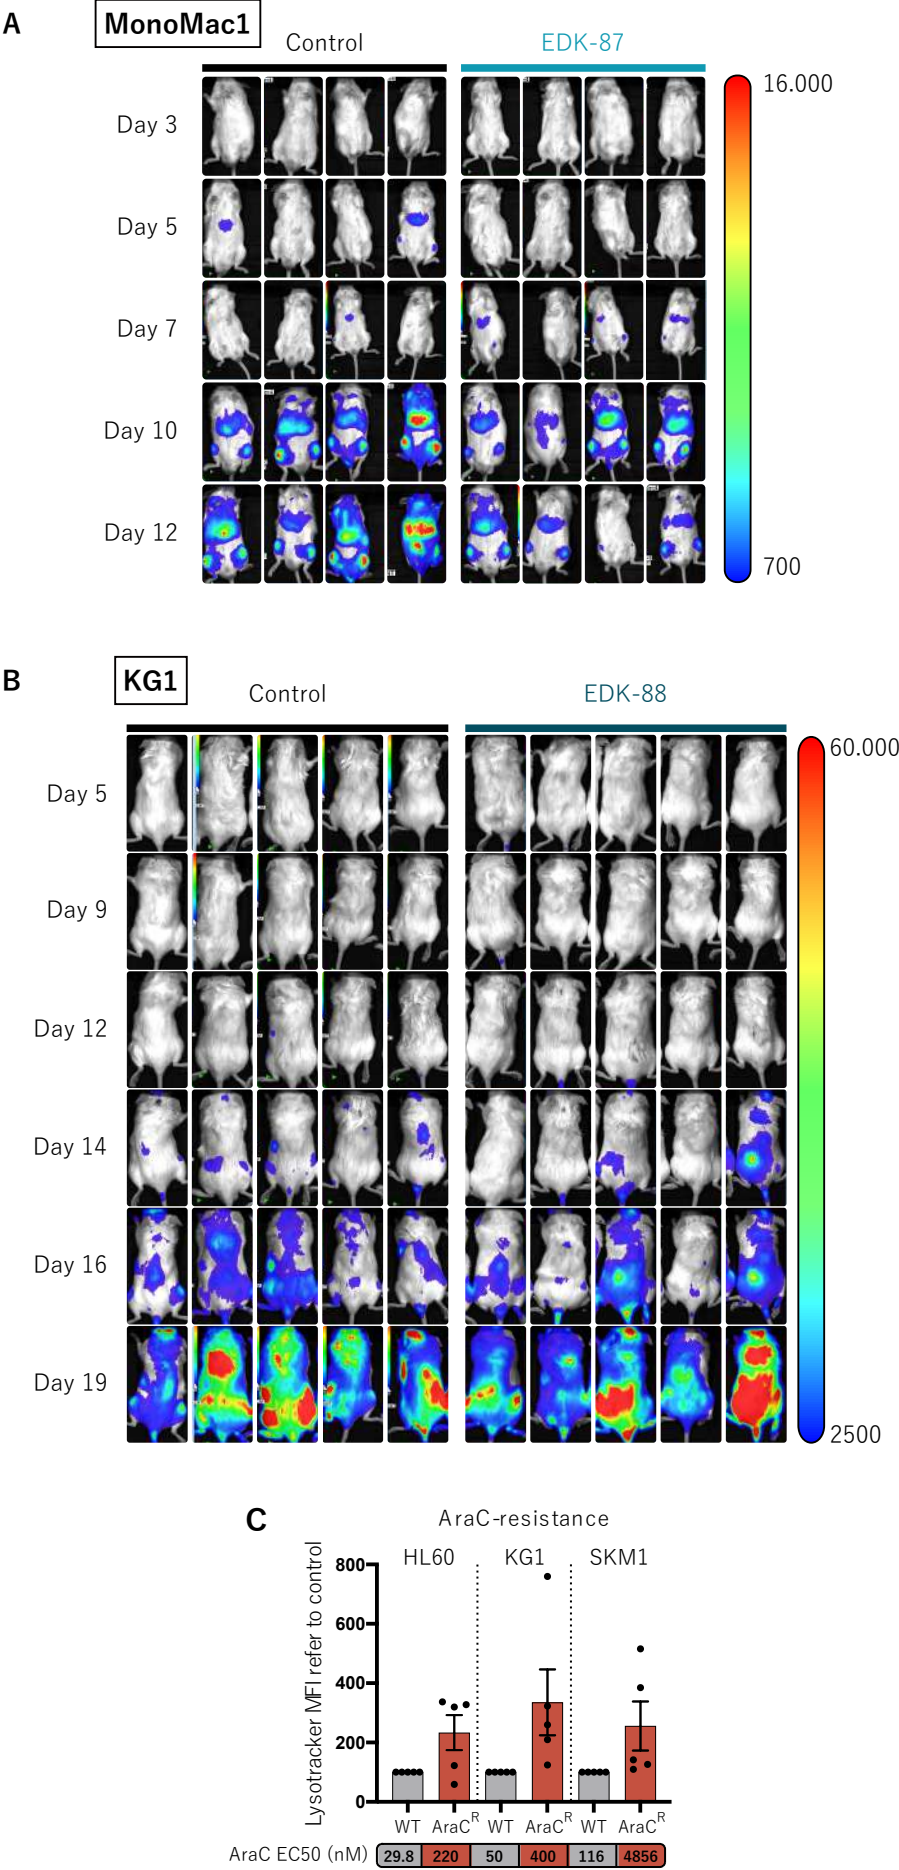

Supplement: s1 [file s1]

**Supplementary Figure S6**

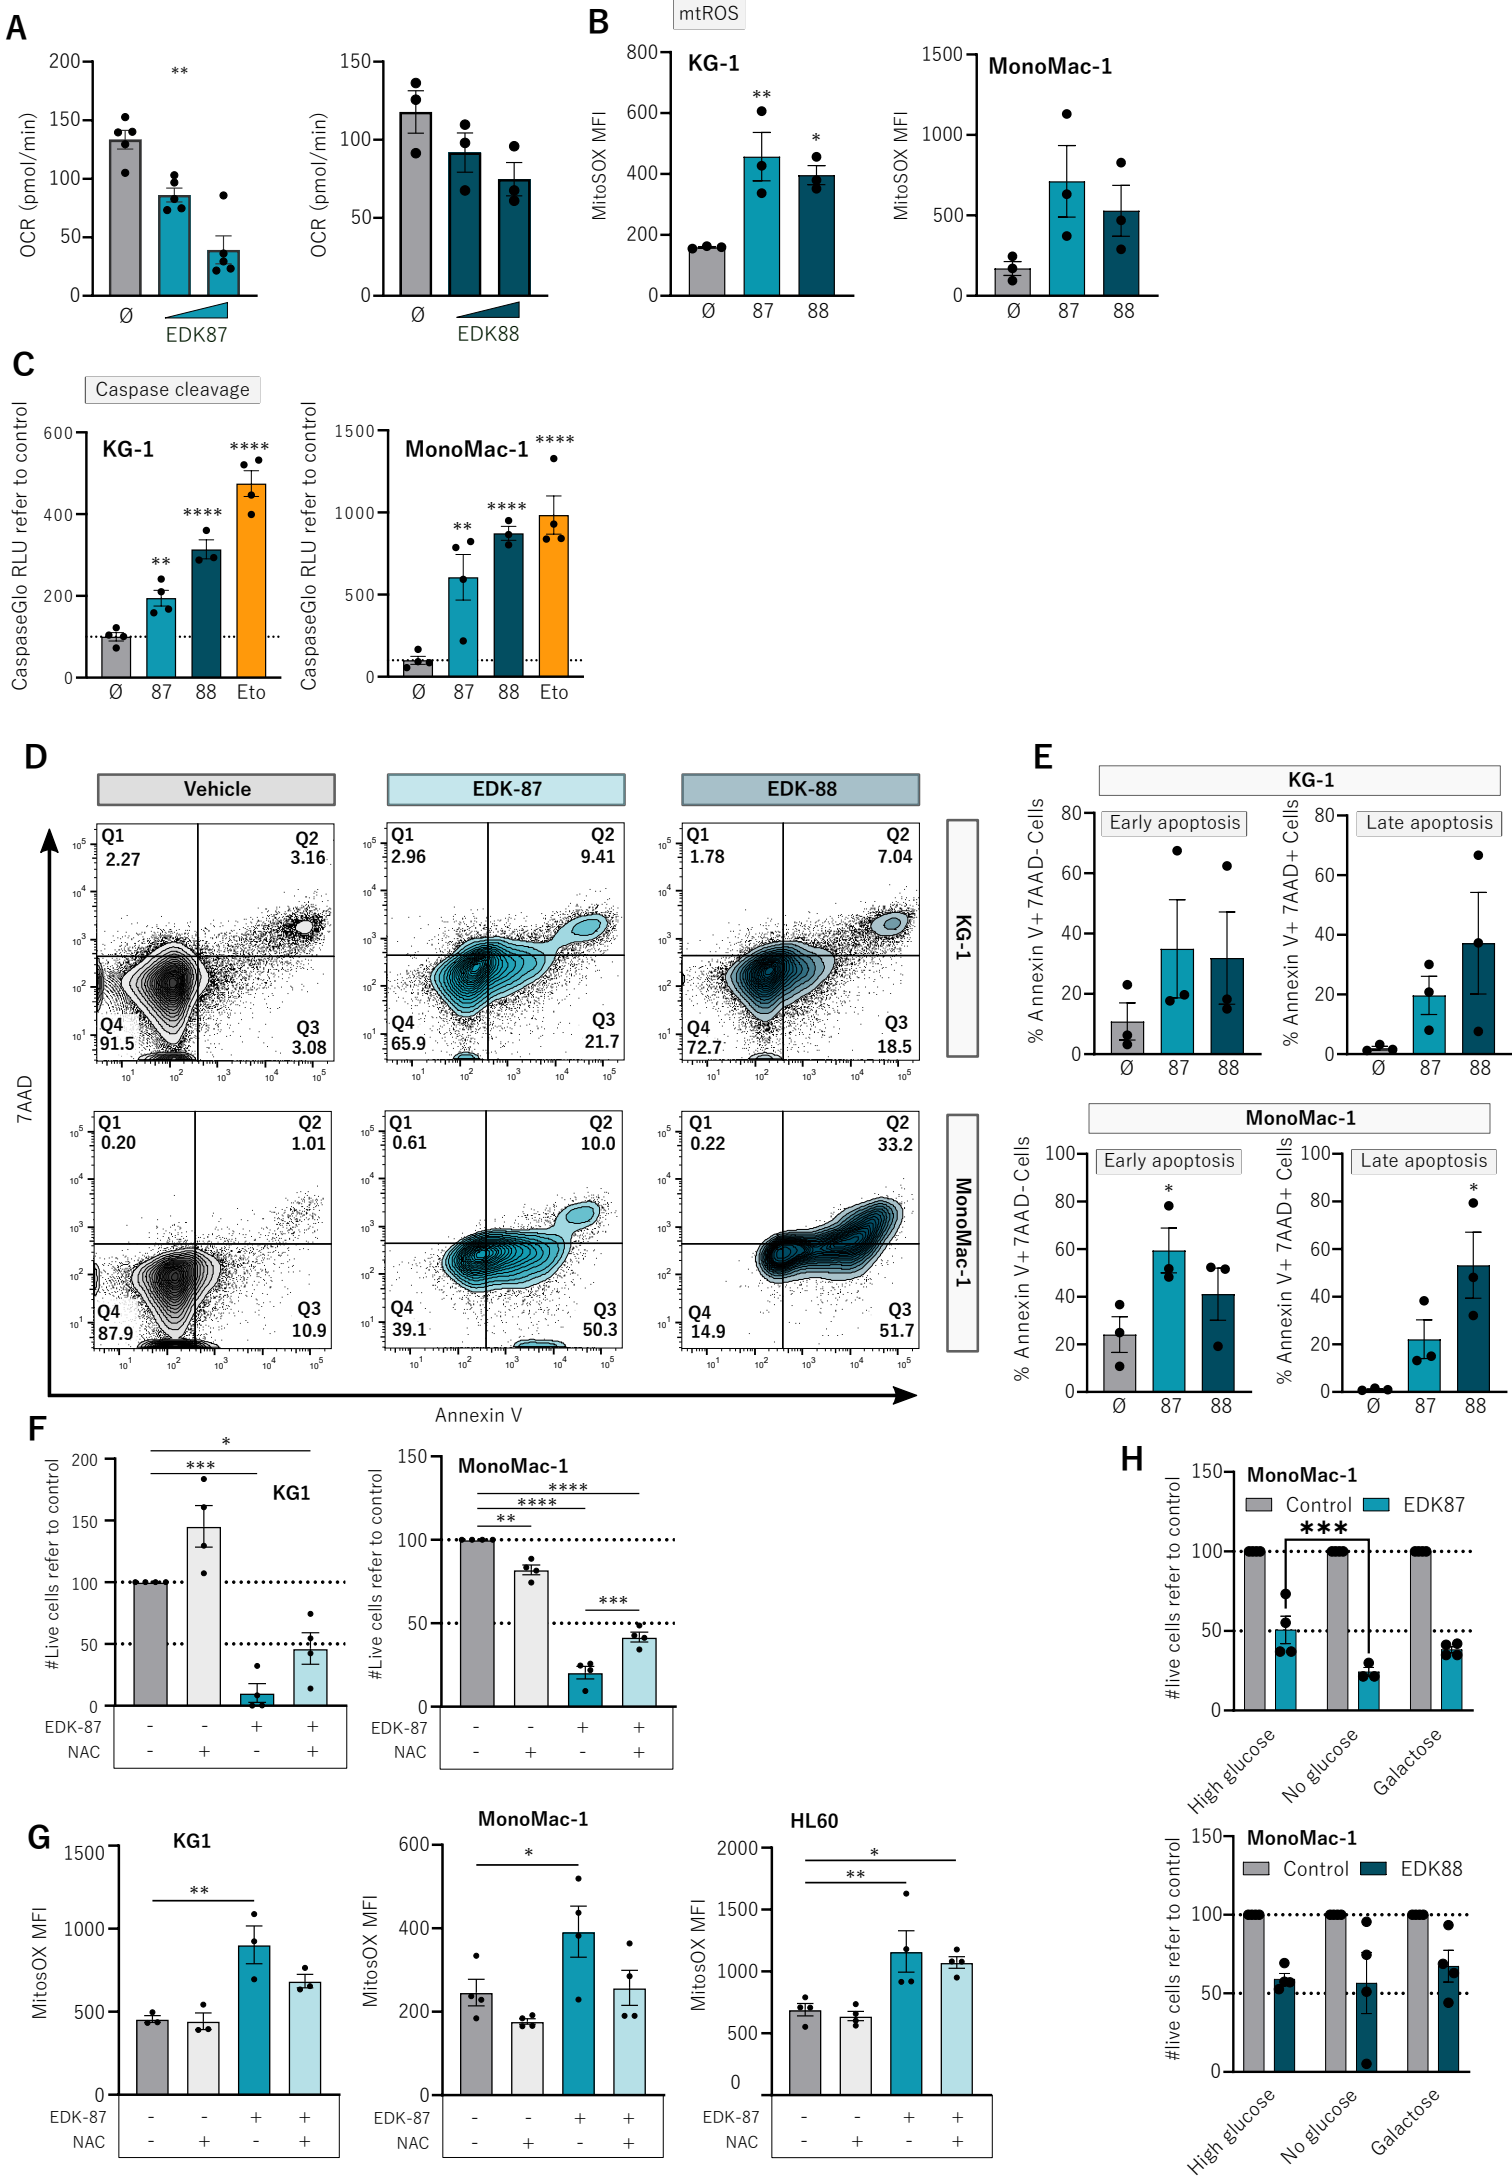

Supplement: s1 [file s1]

Supplementary Figure S3

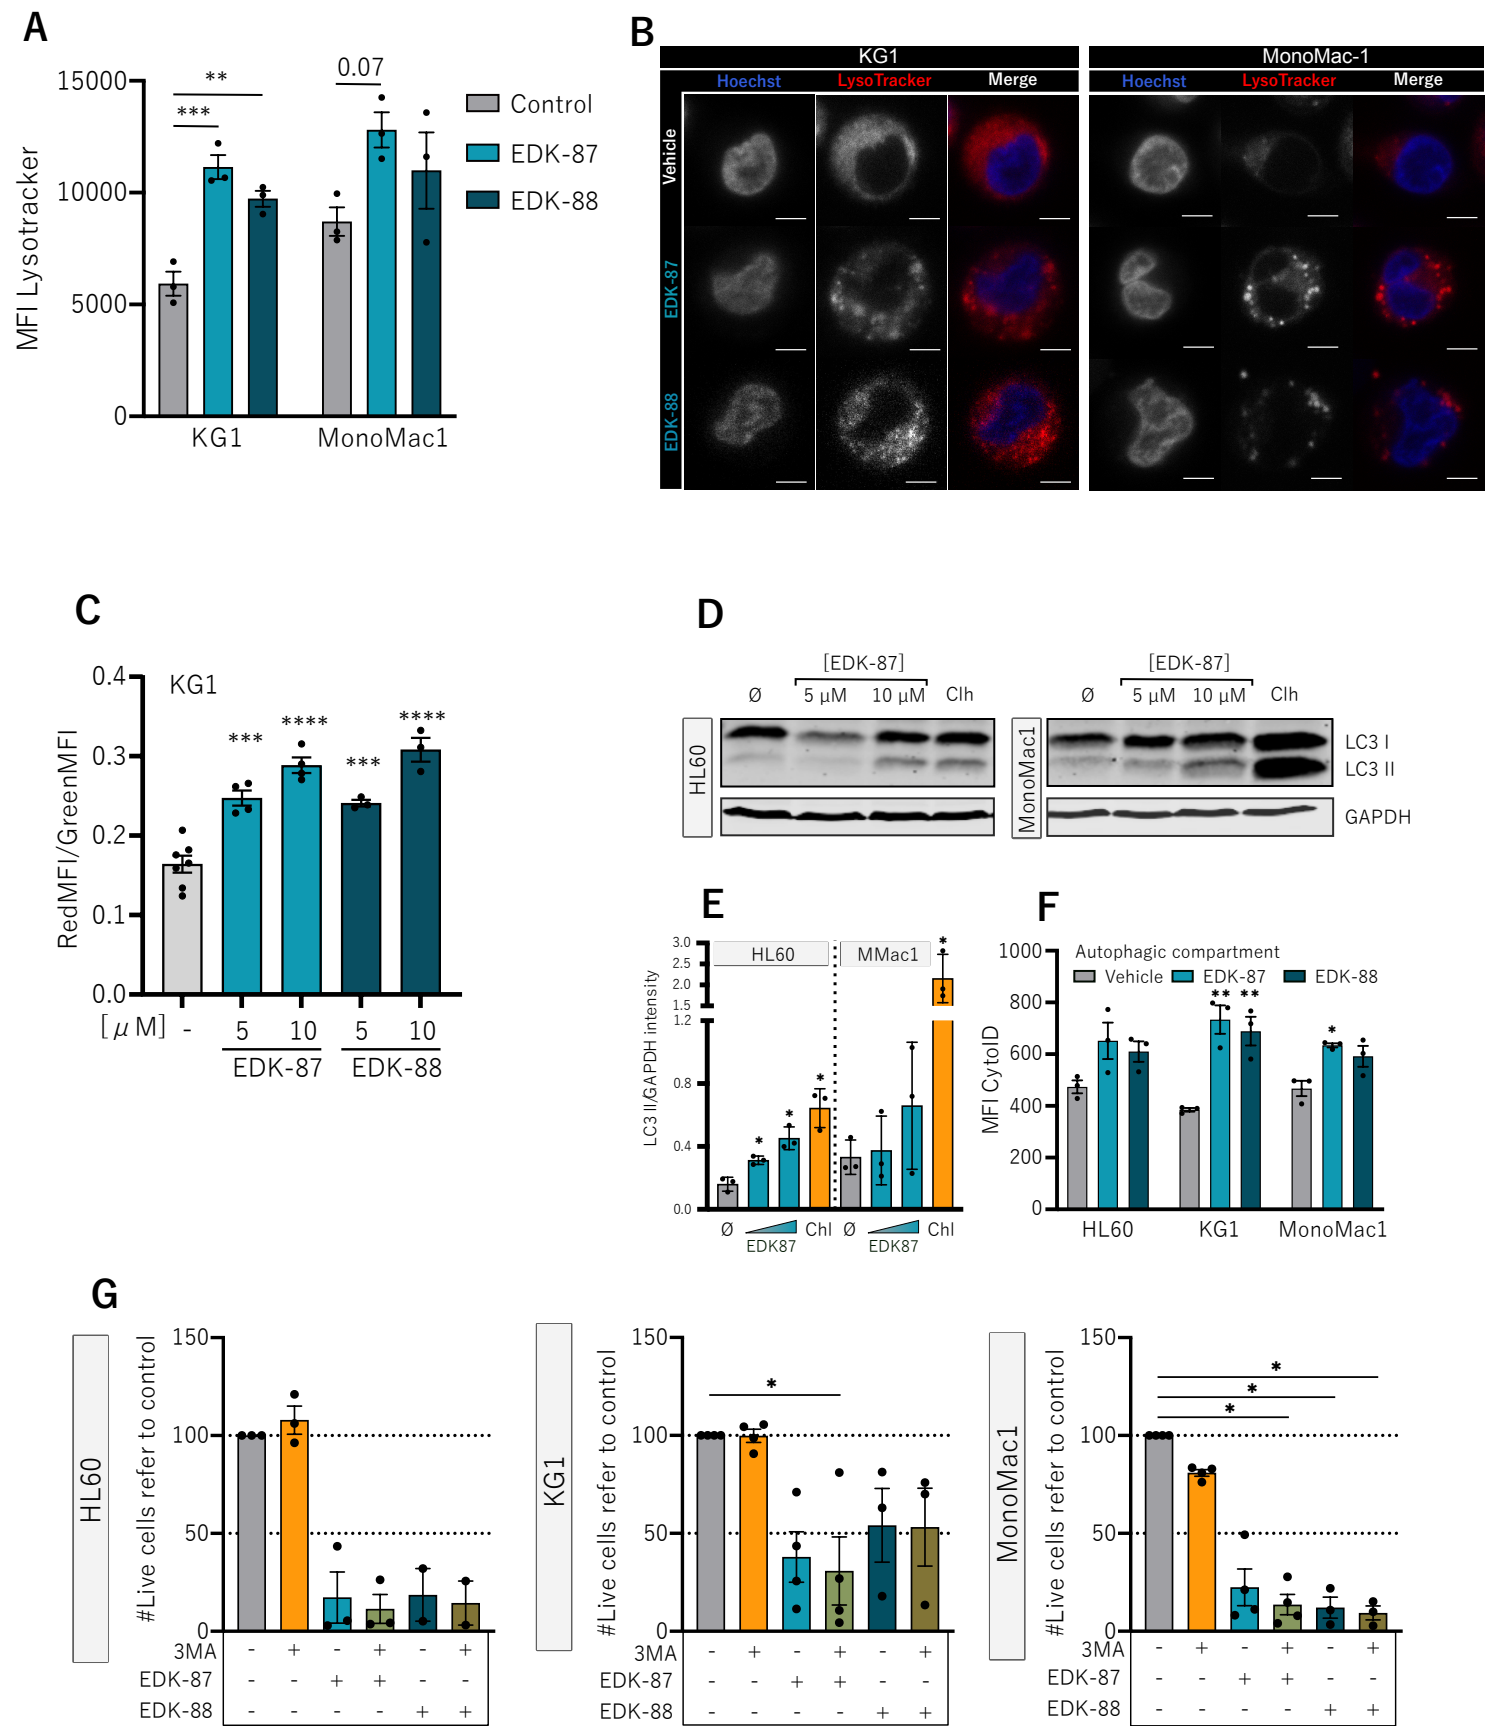

Supplement: s1 [file s1]
